# Supplementary material
Source: Springer Nature journal article supplement (https://www.springermedizin.de/resource/supplementary/12882_2013_713_MOESM4_ESM.pdf/9454400)

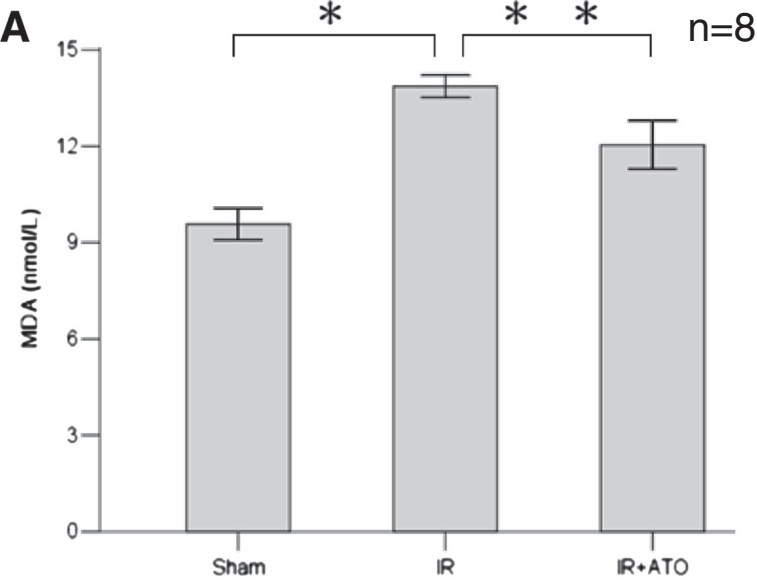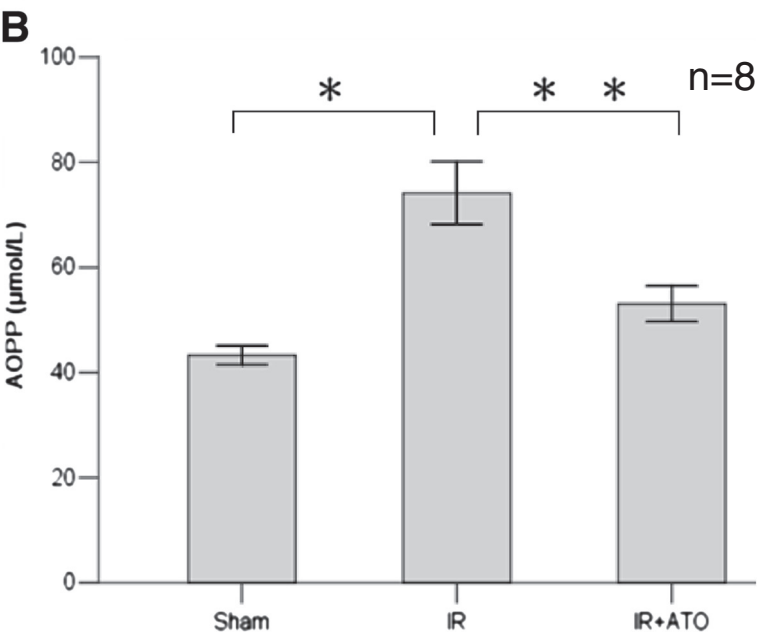

Supplement: MOESM4 [file 9454400]
